# Supplementary material
Source: PubMed Central journal article supplement (PMC2268806)

| <b>A</b>                   | <b>V<sub>H</sub>3H9</b> | <b>V<sub>H</sub>56R</b> | <b>V<sub>H</sub>56R/76R</b> |
|----------------------------|-------------------------|-------------------------|-----------------------------|
| <b>V<sub>K</sub>12/13A</b> | <b>1</b>                | <b>2</b>                | <b>-</b>                    |
| <b>V<sub>K</sub>21D</b>    | <b>3</b>                | <b>4</b>                | <b>5</b>                    |
| <b>V<sub>K</sub>38c</b>    | <b>-</b>                | <b>6</b>                | <b>7</b>                    |
| <b>V<sub>K</sub>4</b>      | <b>8</b>                | <b>-</b>                | <b>9</b>                    |

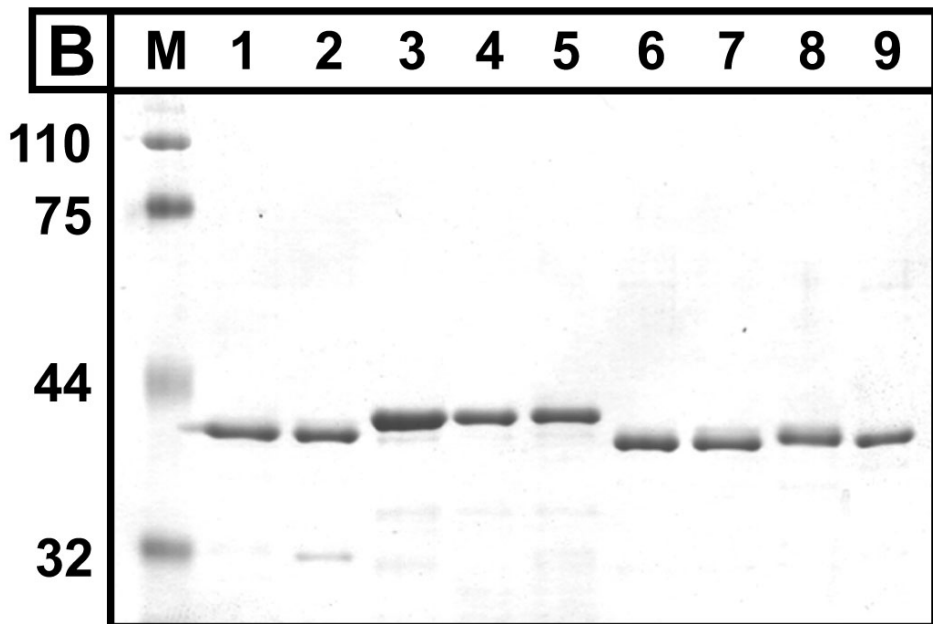

Supplement: pnas_0800025105_1.pdf [file pnas_0800025105_1.pdf]
