# Supplementary material
Source: PubMed Central journal article supplement (PMC2268806)

a. Hardy fraction E (B220+, AA4.1+)

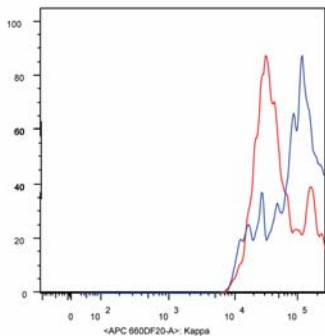

c. spl transitional cells (B220+, AA4.1+)

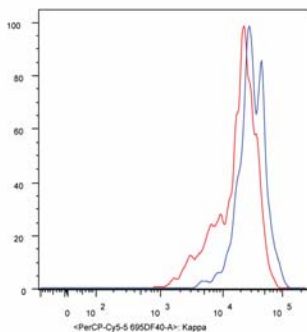

b. Hardy fraction F (B220+, AA4.1-)

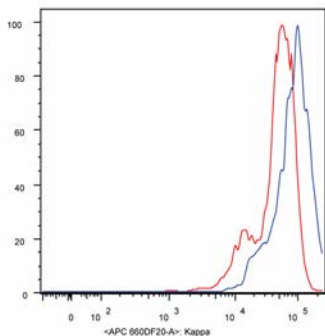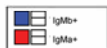

d. follicular cells (B220+, CD21<sup>int</sup>)

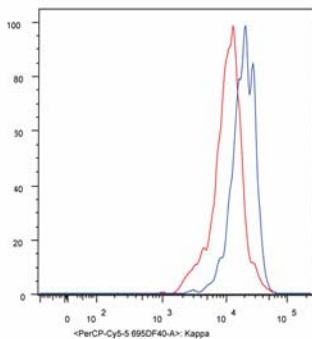

e. marginal zone (B220+, CD21<sup>++</sup>)

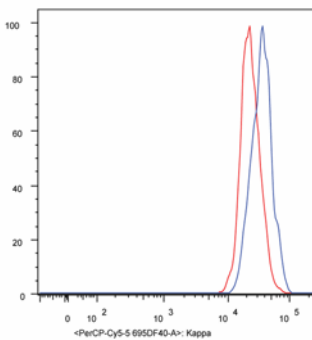

Supplement: pnas_0800025105_2.pdf [file pnas_0800025105_2.pdf]
