# Supplementary material
Source: PubMed Central journal article supplement (PMC2268806)

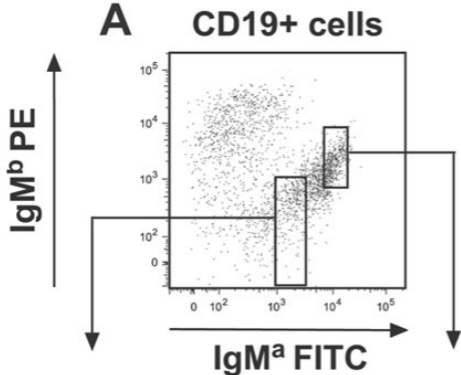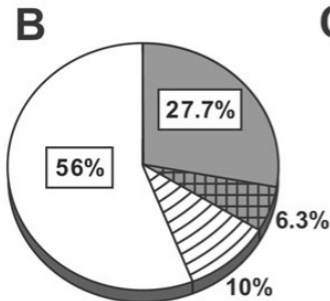

Dull Cells

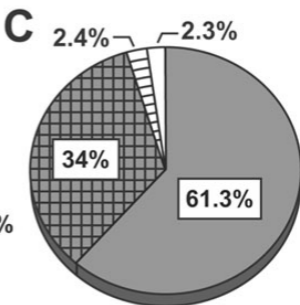

Bright Cells

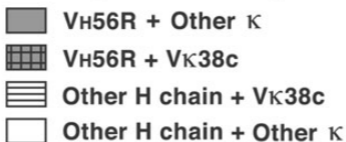

Supplement: pnas_0800025105_3.pdf [file pnas_0800025105_3.pdf]
